# Supplementary material
Source: PubMed Central journal article supplement (PMC1464336)
Supplement: pnas_0509874103_6.pdf [file pnas_0509874103_6.pdf]

**Table 3. Parameter robustness**

| Parameter    | $X_{\text{high}}$ | $X_{\text{low}}$ |
|--------------|-------------------|------------------|
| $\alpha$     | 141.96            | 120.15           |
| $\beta$      | 82.95             | 81.22            |
| $\rho$       | 85.78             | 94.37            |
| $\lambda$    | 177.18            | 120.88           |
| $N_{LacY}$   | 73.62             | 91.61            |
| $N_{GFP}$    | 82.42             | 94.70            |
| $N_{LacI}$   | 75.12             | 89.13            |
| $b_{LacY}$   | 83.29             | 63.02            |
| $b_{GFP}$    | 90.80             | 71.45            |
| $b_{LacI}$   | 70.27             | 74.07            |
| $\tau_{1/2}$ | 95.61             | 119.71           |

Results of parameter robustness simulations where fractional error ( $X$ ) is reported for changes in each individual parameter. For comparison, the cost calculated from two replicates of the same experiment is  $X_{\text{Experimental}} = 45.50$  and the cost for parameters given by values in Table 1 is  $X_0 = 67.02$ .
