# Supplementary material
Source: PubMed Central journal article supplement (PMC1464336)

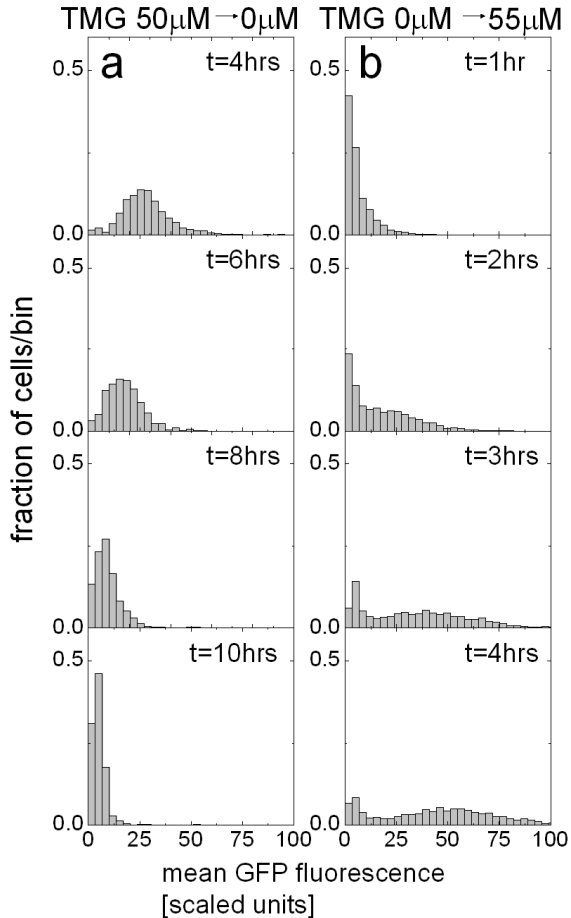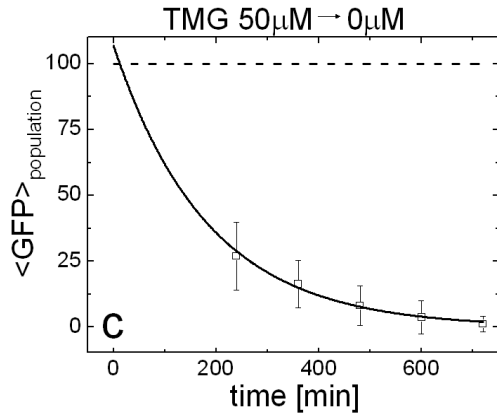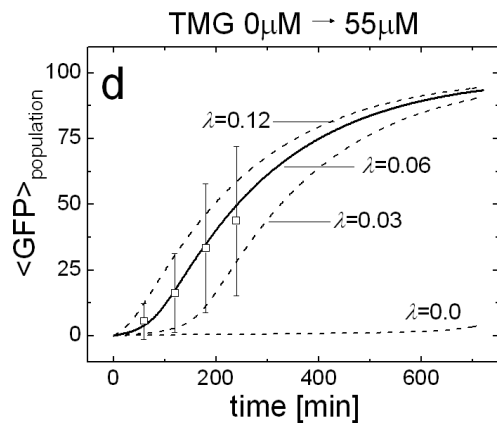

Supplement: pnas_0509874103_1.pdf [file pnas_0509874103_1.pdf]

steady state GFP  
[scaled units]

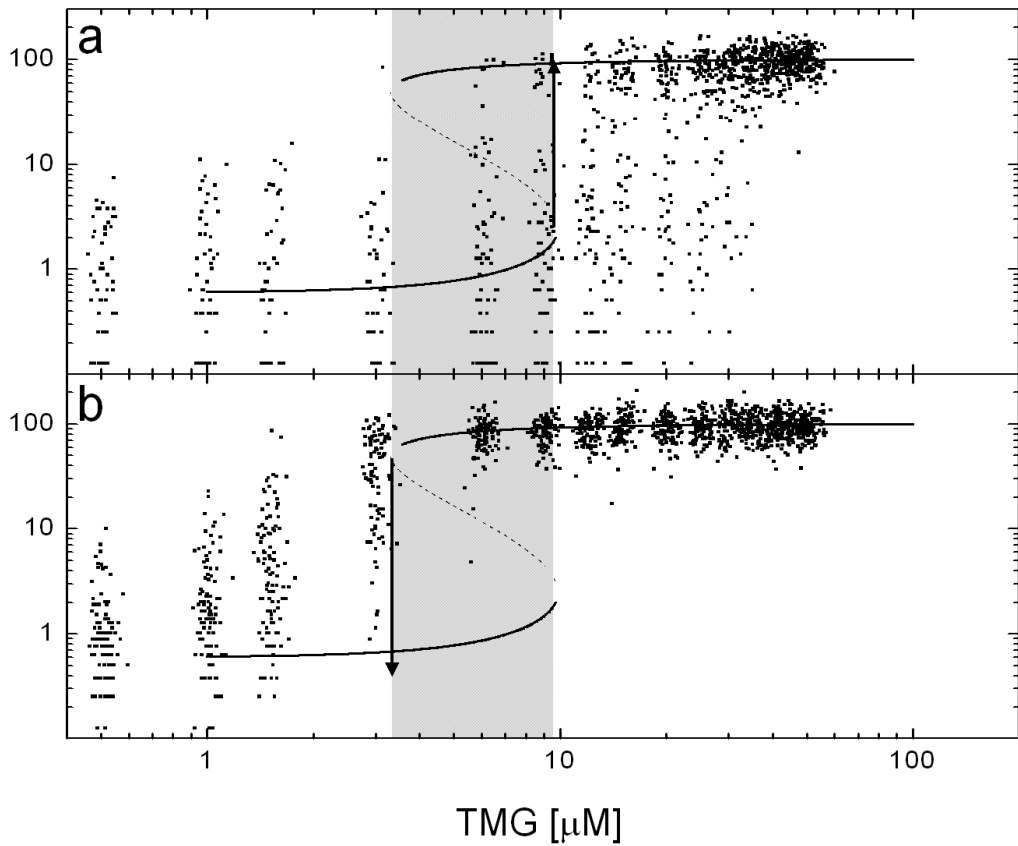

Supplement: pnas_0509874103_2.pdf [file pnas_0509874103_2.pdf]

6  $\mu\text{M}$  TMG

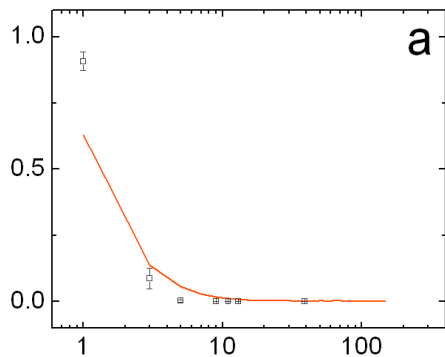

9  $\mu\text{M}$  TMG

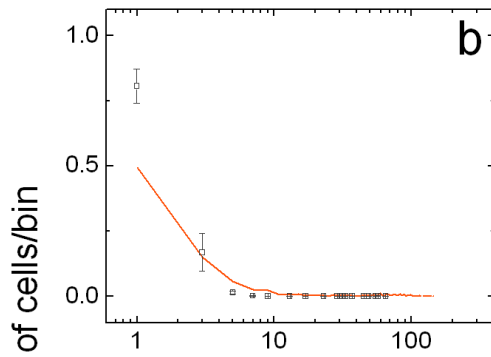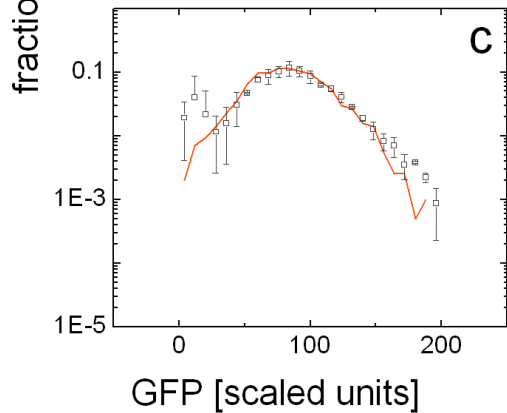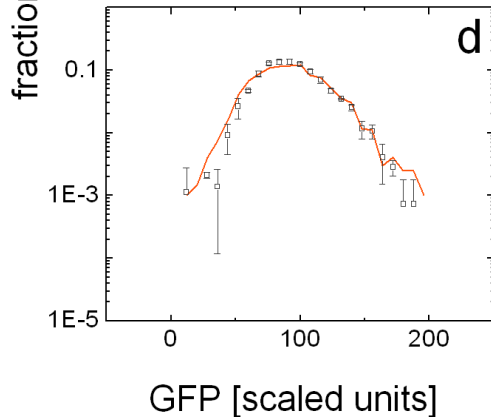

Supplement: pnas_0509874103_3.pdf [file pnas_0509874103_3.pdf]

# OFF to ON Transition Rate

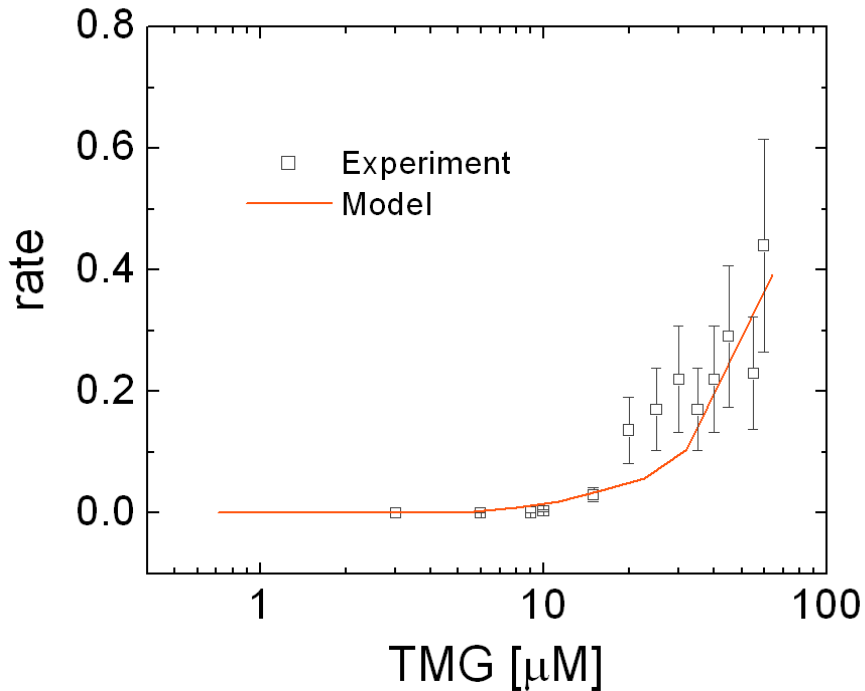

Supplement: pnas_0509874103_4.pdf [file pnas_0509874103_4.pdf]
